# Supplementary material for: α-Zirconium phosphate-based nanoarchitectures on polyester fabrics through layer-by-layer assembly
Source: Royal Society of Chemistry journal article supplement (doi:10.1039/c1jm11287b), 2011-01-01
Supplement: c1jm11287b.pdf [file c1jm11287b.pdf]

## Electronic Supplementary Information (ESI†)

### $\alpha$ -zirconium phosphate-based nanoarchitectures on polyester fabrics through Layer-by-Layer assembly

Federico Carosio, Jenny Alongi and Giulio Malucelli\*

*Dipartimento di Scienza dei Materiali e Ingegneria Chimica, Politecnico di Torino, Viale Teresa Michel 5, 15121 Alessandria, Italy.*

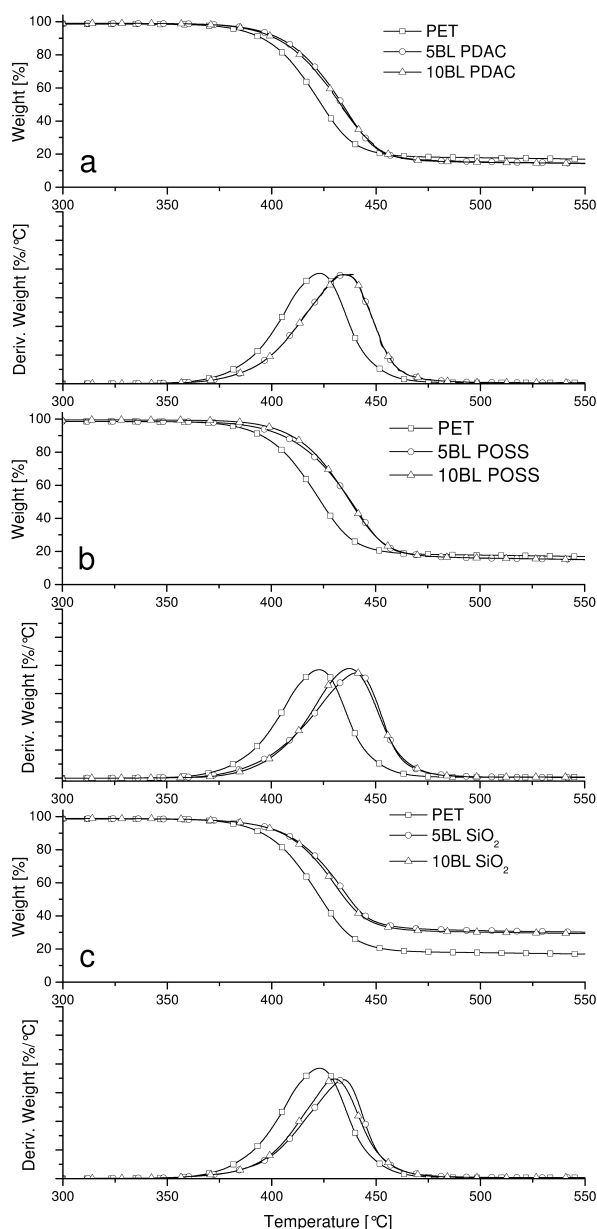

**Figure S1.** TG and dTG curves of neat PET, PDAC (a), POSS (b) and SiO<sub>2</sub> (c) treated fabrics in nitrogen.

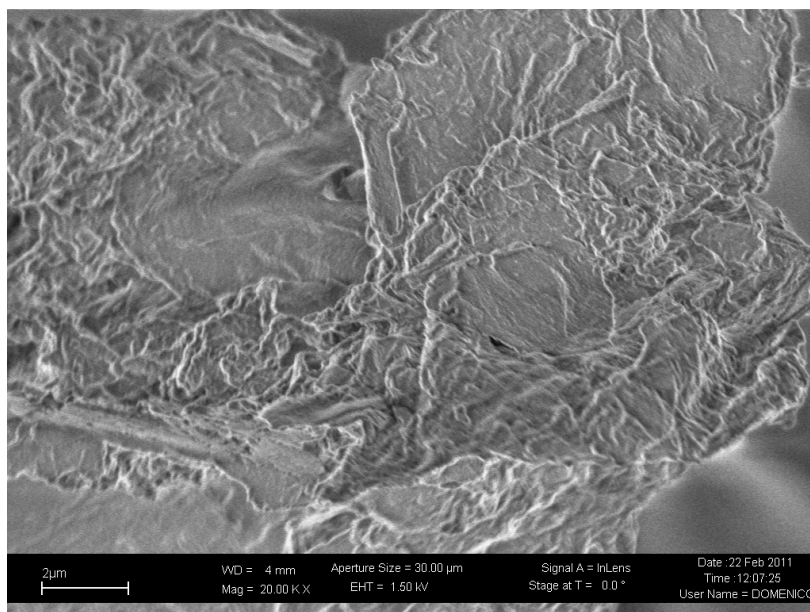

**Figure S2.** SEM magnification related to SiO<sub>2</sub> 10 BL assemblies (20000X).
